# Supplementary material for: Fabrication of textile fabric counter electrodes using activated charcoal doped multi walled carbon nanotube hybrids for dye sensitized solar cells
Source: Royal Society of Chemistry journal article supplement (doi:10.1039/c5ta08858e), 2015-12-15
Supplement: c5ta08858e1.pdf [file c5ta08858e1.pdf]

## **Fabrication of textile fabric counter electrode using activated charcoal doped multiwalled carbon nanotube hybrid for dye sensitized solar cell**

Alvira Ayoub Arbab<sup>a</sup>, Kyung Chul Sun<sup>b</sup>, Iftikhar Ali Sahito<sup>a</sup>, Anam Ali Memon<sup>a</sup>, Yun Seon Choi<sup>a</sup>, Sung Hoon Jeong<sup>a\*</sup>

<sup>a</sup>Department of Organic and Nano Engineering, Hanyang University, Seoul 133-791, Korea

<sup>b</sup>Department of Fuel cells and hydrogen technology, Hanyang University, Seoul 133-791, Korea

Email: [shjeong@hanyang.ac.kr](mailto:shjeong@hanyang.ac.kr) (corresponding author)

## SUPPORTING INFORMATION

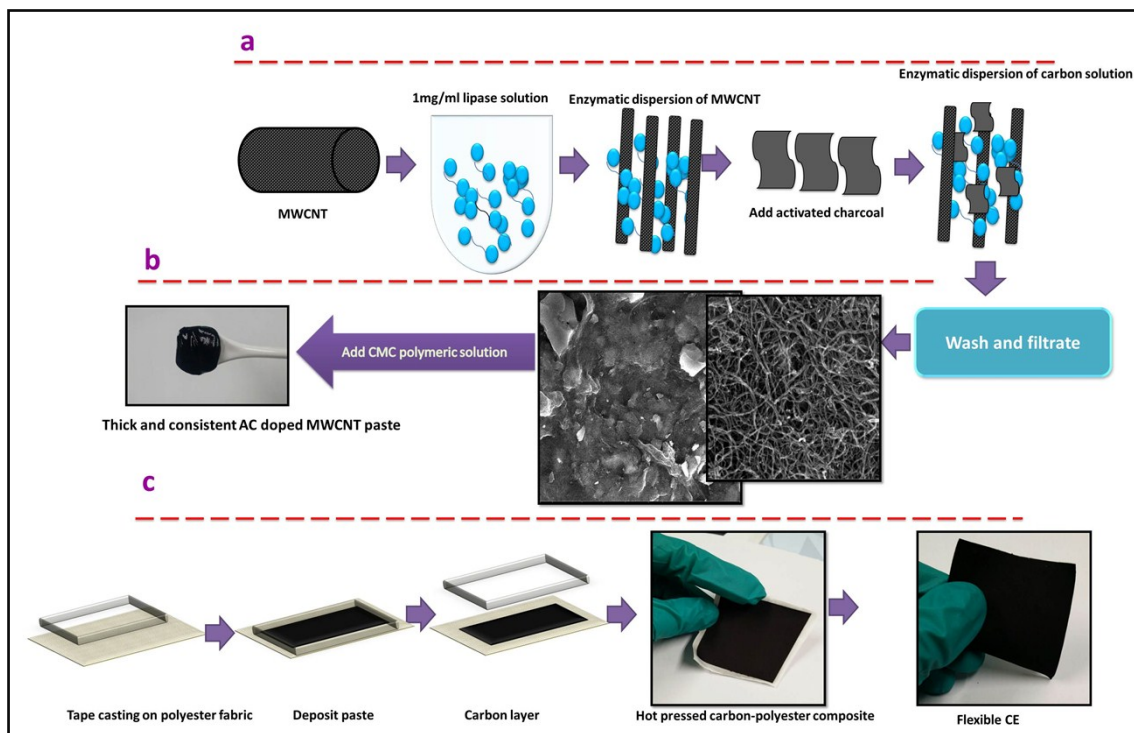

**Fig. S1** Schematic illustration of fabrication of carbon fabric composite counter electrode. (a) Enzymatic dispersion of carbon nanotube and activated charcoal. (b) Filtration and addition of binder. (c) Printing of AC doped MWCNT on polyester fabric.

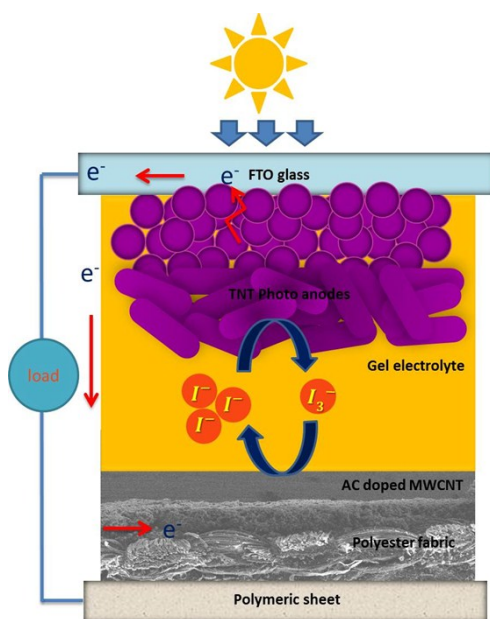

**Fig. S2** Schematic illustration of DSSC fabricated with carbon fabric composite counter electrode.

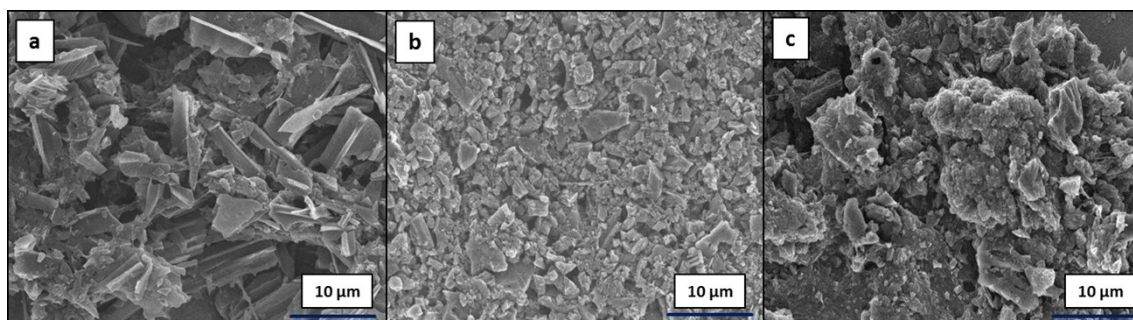

**Fig. S3** FE-SEM images of (a) Pine tree (b) coconut shell and (c) coal derived activated charcoal.

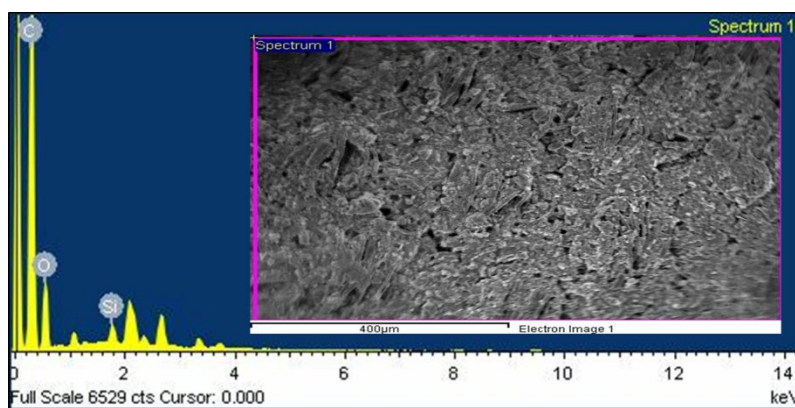

**Fig. S4** EDS spectrum of carbon fabric composite.

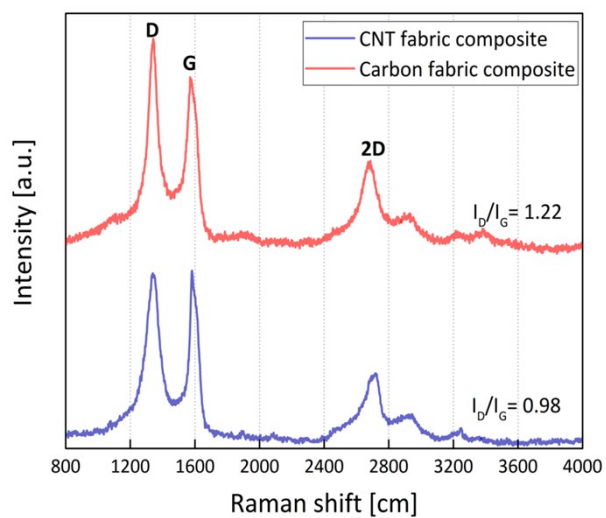

**Fig. S5** Raman Spectrum of MWCNT and AC doped MWCNT coated fabric.

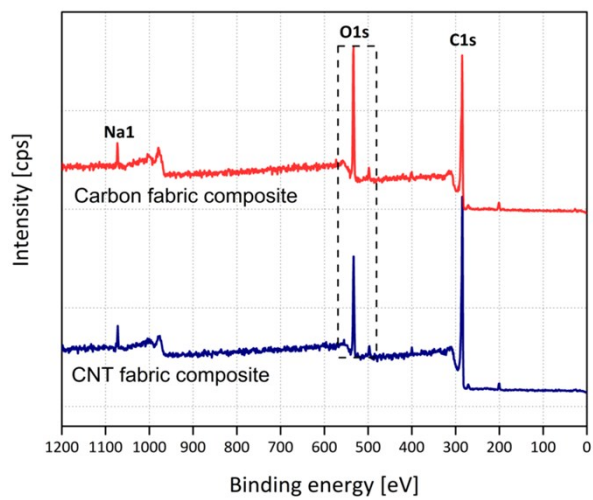

**Fig. S6** XPS spectrum of MWCNT coated fabric and AC doped MWCNT coated fabric.

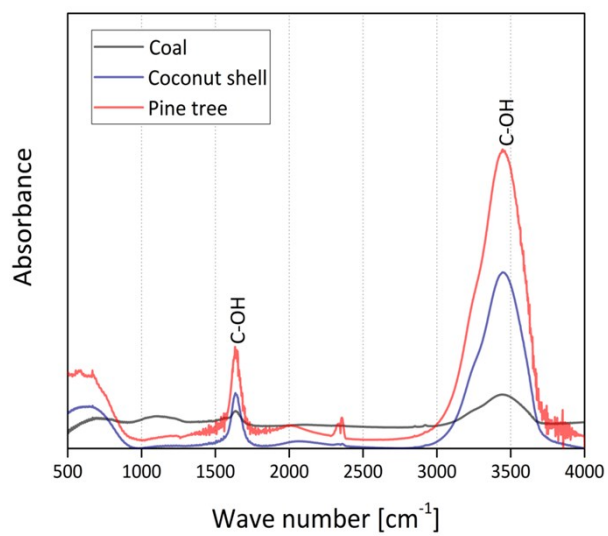

**Fig. S7** FT-IR spectrum of different activated carbon.

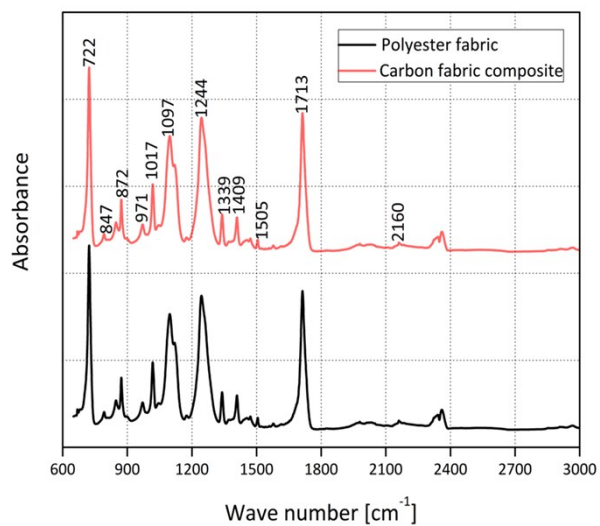

**Fig. S8** FT-IR ATR spectrum of polyester fabric and carbon fabric composite.

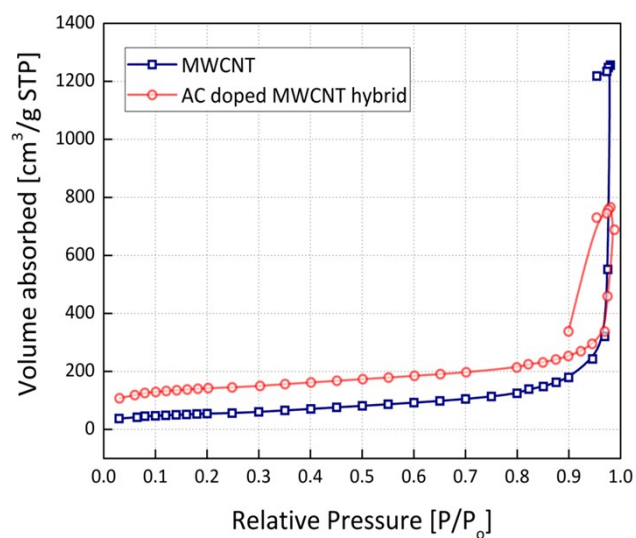

**Fig. S9** N<sub>2</sub> absorption-desorption isotherms of MWCNT and AC doped MWCNT hybrid.

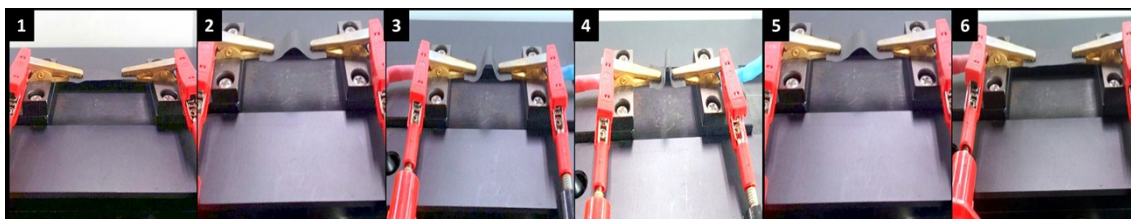

**Fig. S10** Custom-build two probe device measuring electrical resistance of carbon fabric composite at different statuses.

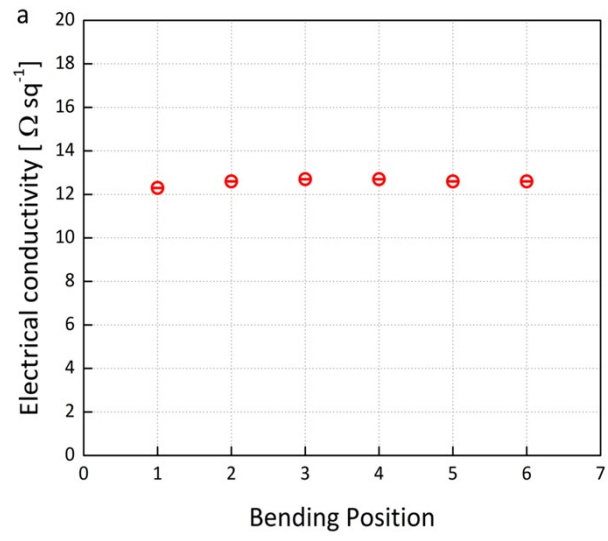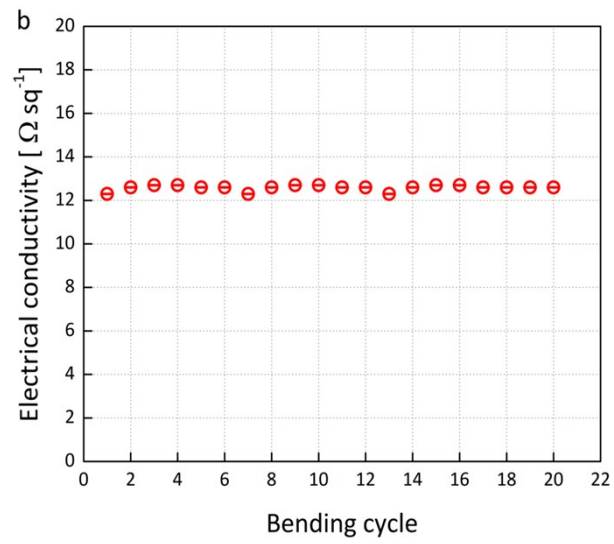

**Fig. S11(a)** Electrical resistance of carbon fabric composite at different bending position.

(b) Electrical resistance of the carbon fabric composite electrode against bending cycle.

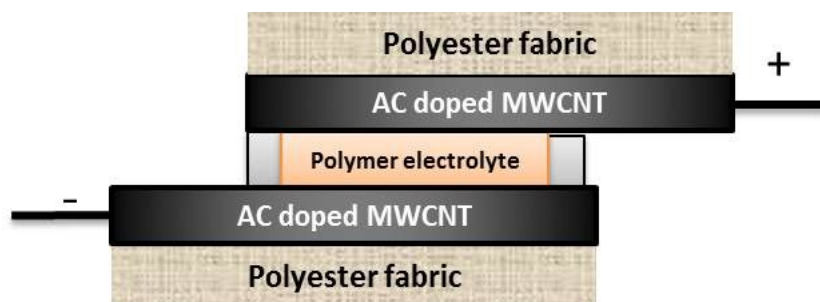

**Fig. S12** Schematic illustration of symmetrical cell fabrication with carbon fabric composite.

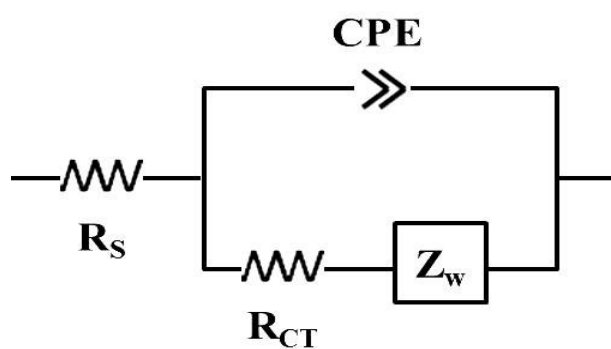

**Fig. S13** Randles-type equivalent circuit.
